# Supplementary material
Source: PubMed Central journal article supplement (PMC60076)

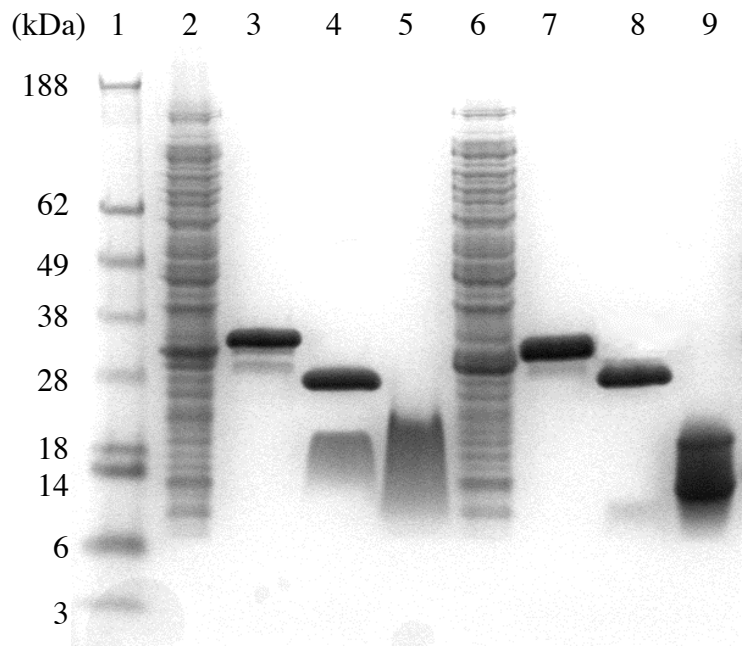

Supplement: pnas_221463098_4.pdf [file pnas_221463098_4.pdf]

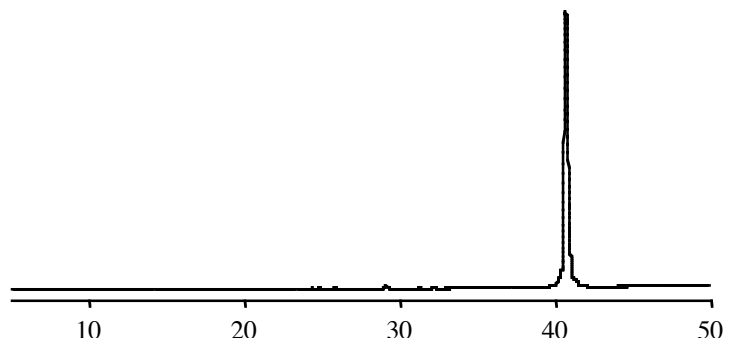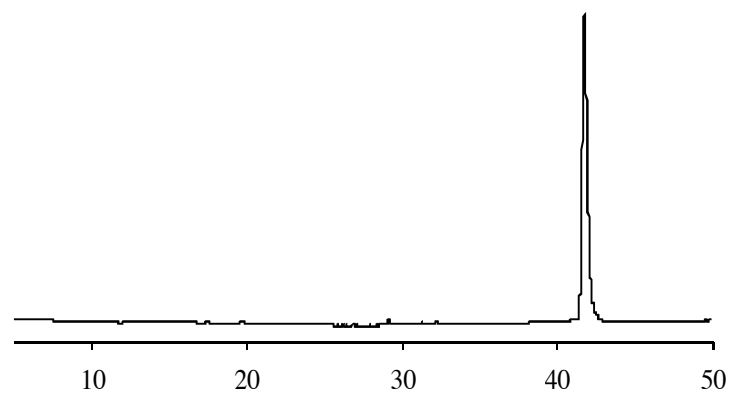

Time (min)

Supplement: pnas_221463098_5.pdf [file pnas_221463098_5.pdf]

A.

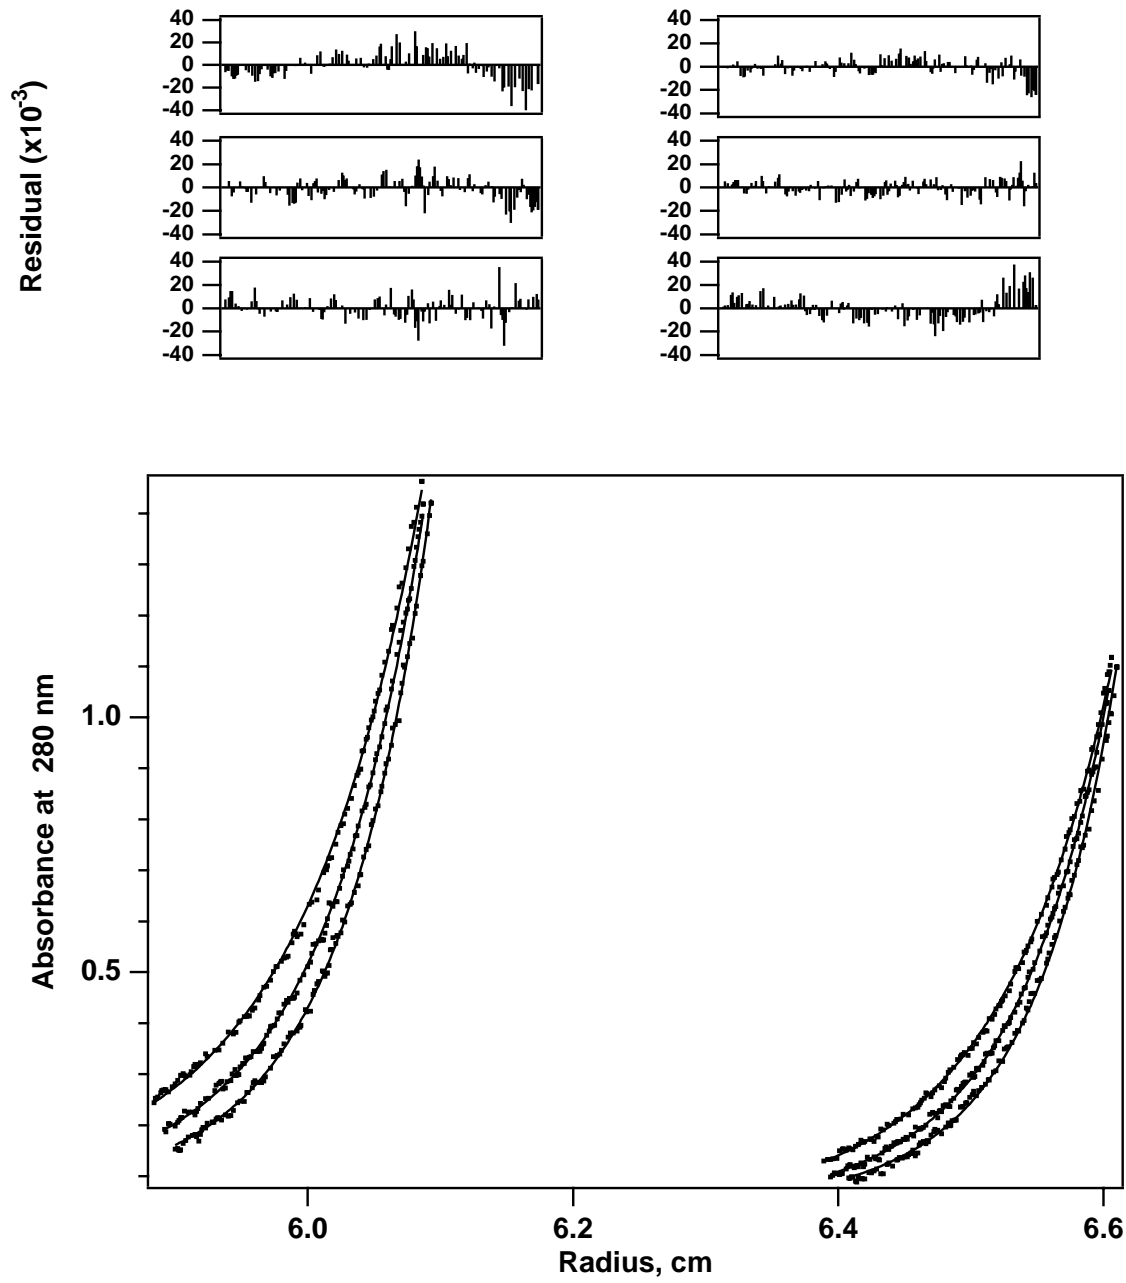

B.

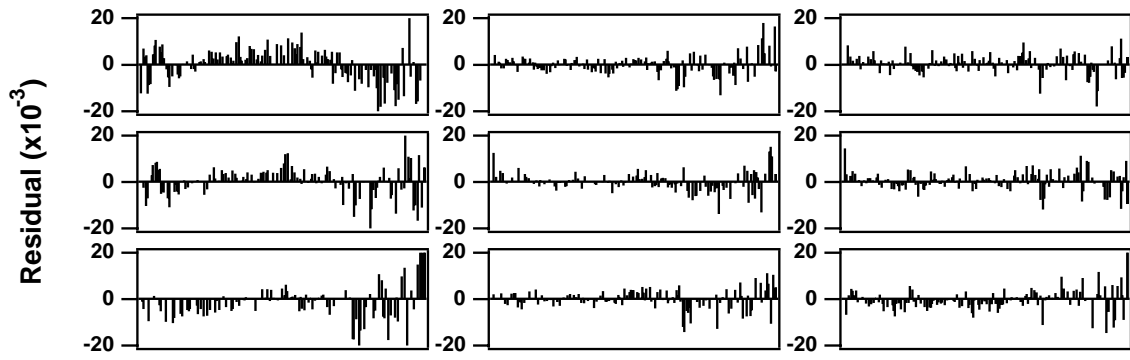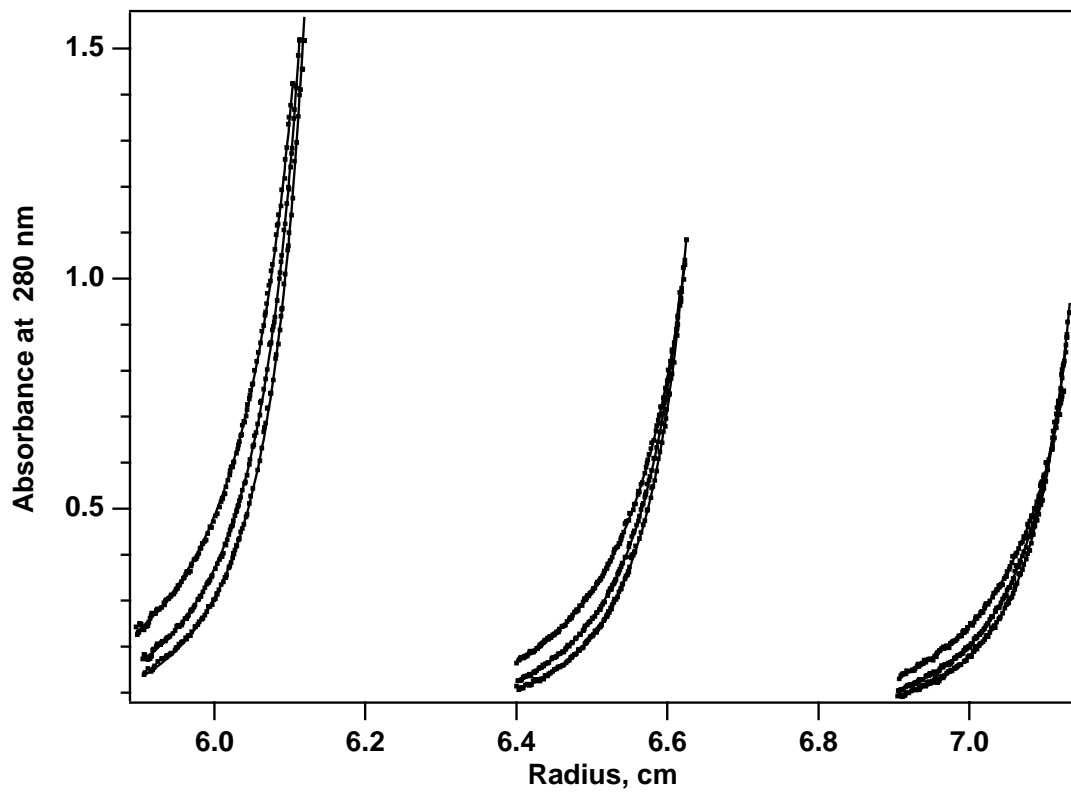

Supplement: pnas_221463098_6.pdf [file pnas_221463098_6.pdf]
